# Supplementary material for: Addition of exogenous diacylglycerol enhances Wnt/β-catenin signaling through stimulation of macropinocytosis
Source: PubMed Central journal article supplement — iScience. 2023 Sep 28;26(10):108075. doi: 10.1016/j.isci.2023.108075 (PMC10582480; doi:10.1016/j.isci.2023.108075), 2023-09-28
Supplement: mmc1.pdf [file mmc1.pdf]

iScience, Volume 26

## **Supplemental information**

### **Addition of exogenous diacylglycerol enhances Wnt/ $\beta$ -catenin signaling through stimulation of macropinocytosis**

**Yagmur Azbazar, Nydia Tejada-Munoz, Julia C. Monka, Alex Dayrit, Grace Binder, Gunes Ozhan, and Edward M. De Robertis**

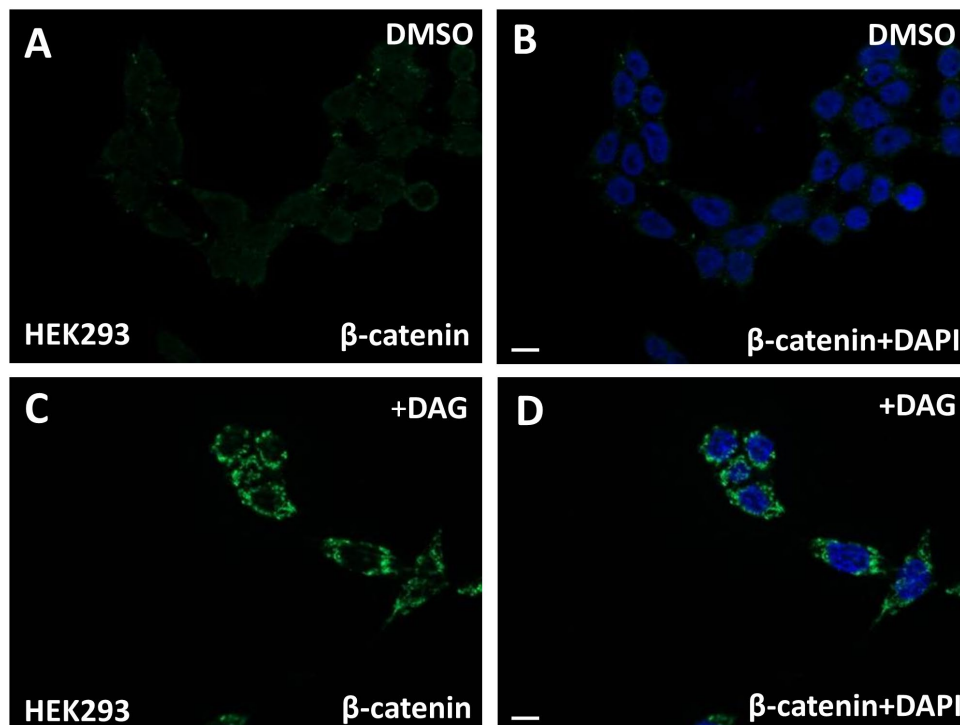

**Supplemental Figure S1.  $\beta$ -catenin levels in cytoplasmic vesicles are induced by DAG in HEK293 with low levels of endogenous Wnt signaling, related to Figure 3**

(A) Total  $\beta$ -catenin staining of HEK293 cells.

(B) Merge with DAPI staining.

(C) The addition of DAG (35  $\mu$ M) increases  $\beta$ -catenin levels in cytoplasmic vesicles within 2h in HEK293 cells;  $\beta$ -catenin is known to relocalize to MVBs together with its destruction complex<sup>19</sup>

(D) Merge with DAPI staining in DAG stimulated HEK293 cells. Scale bars are 10  $\mu$ M.
